# Supplementary material
Source: Research Square preprint supplement (doi:10.21203/rs.3.rs-8969943/v1)
Supplement: Supplementary file 1 [file 4503894c8a19aca50c8e2aea.docx]

**Research Highlights**

**Phase-Transition Structure as Foundation for Cryptographic Hardness**

Robin Bisht*

*Independent Researcher*

*Corresponding author: bishtrobin75@gmail.com

# Executive Summary

The security of modern cryptographic systems relies on the average-case intractability of specific computational problems. While worst-case complexity is well-defined, the structural origins of average-case hardness have remained largely empirical. Here we show that computational hardness in constraint satisfaction problems (CSPs) is fundamentally governed by structural phase transitions in their underlying statistical-mechanical landscapes. By mapping CSP instances to diluted spin-glass models, we demonstrate that the onset of exponential algorithmic difficulty coincides with the clustering threshold (*d*), where the solution space shatters into a "shattered phase" of exponentially many disconnected clusters separated by extensive free-energy barriers. Our results establish that hardness is not an accidental property but a predictable consequence of landscape fragmentation. We provide a structural foundation for cryptographic hardness assumptions, offering a principled framework for constructing average-case hard problem ensembles that are robust against both local search and message-passing algorithms.

# Key Highlights

**Structural Correspondence:**

Established a formal link between the computational hardness of 3-SAT and free-energy barrier densities in statistical physics. The barrier-hardness correspondence posits that exponential algorithmic difficulty emerges when solution landscapes develop extensive free-energy barriers between metastable states.

**Landscape Fragmentation:**

Identified the clustering threshold (*d*3.86) as the critical point where solution space connectivity collapses, trapping local search algorithms in metastable states. Above this threshold, the solution space shatters into exponentially many disconnected clusters.

**Universal Scaling:**

Experimentally validated finite-size scaling laws for algorithmic runtime near criticality, identifying a universal critical exponent2.3. This exponent governs the width of the critical window at finite system sizes and enables prediction of hardness scaling across different problem dimensions.

**Cryptographic Foundation:**

Proposed a new class of hardness assumptions based on phase-transition thresholds, bridging the gap between complexity theory and physical heuristics. This framework provides a principled basis for constructing cryptographic primitives with predictable average-case hardness.

**Algorithmic Benchmarking:**

Demonstrated that state-of-the-art CDCL solvers (Kissat, CaDiCaL) achieve their peak runtime complexity in the critical window*d*<<*s*, confirming the "easy-hard-easy" transition profile characteristic of phase-transition phenomena.

# Technical Metrics

| **Metric** | **Value (k=3)** | **Significance** |
| --- | --- | --- |
| Clustering Threshold (αₖ) | ≈ 3.86 | Onset of shattered phase and exponential hardness |
| Satisfiability Threshold (αₛ) | ≈ 4.267 | Zero-temperature phase transition to UNSAT |
| Scaling Exponent (ν) | ≈ 2.3 | Governs the width of the critical window at finite N |
| Peak Hardness Density (γₘₐₓ) | ≈ 0.015 | Rate of exponential runtime growth T ∼ exp(γN) |

# Broader Impact

*This work bridges statistical mechanics and computational complexity, providing a predictive framework for understanding where hard computational instances concentrate. The phase-transition perspective offers a principled basis for constructing cryptographic primitives and benchmarking solver performance across the entire problem hardness spectrum.*

# Keywords

computational complexity, phase transitions, cryptographic hardness, constraint satisfaction, statistical mechanics, spin glasses, satisfiability threshold, clustering transition

# Competing Interests

The author declares no competing interests.
